# Supplementary material
Source: PubMed Central journal article supplement (PMC4125728)
Supplement: supp_M113.036350_mcp.M113.036350-3.pdf [file supp_M113.036350_mcp.M113.036350-3.pdf]

A foundation for reliable spatial proteomics experiments  
data analysis  
Supplementary tables

## Trans-localisations

|           | from          | to            |
|-----------|---------------|---------------|
| AT5G45160 | ER membrane   | TGN           |
| AT5G61840 | Golgi         | PM            |
| AT1G27390 | Mitochondrion | Plastid       |
| AT2G47840 | Plastid       | ER            |
| AT2G14720 | TGN           | Golgi         |
| AT4G26690 | PM            | Vacuola       |
| AT2G21410 | vacuole       | Mitochondrion |

Table 1: The seven marker proteins that have been trans-localised and their destination organelles. The destination profiles have been computed by averaging the fractions of the destination organelle markers.

|             | svm           | svm.scores |
|-------------|---------------|------------|
| AT5G45160.1 | ER membrane   | 0.97       |
| AT5G45160.3 | TGN           | 0.78       |
| AT5G61840.1 | Golgi         | 0.87       |
| AT5G61840.3 | PM            | 0.94       |
| AT1G27390.1 | Mitochondrion | 0.87       |
| AT1G27390.3 | Plastid       | 0.94       |
| AT2G47840.1 | Plastid       | 0.54       |
| AT2G47840.3 | ER membrane   | 0.97       |
| AT2G14720.1 | TGN           | 0.82       |
| AT2G14720.3 | Golgi         | 0.92       |
| AT4G26690.1 | PM            | 0.93       |
| AT4G26690.3 | vacuole       | 0.89       |
| AT2G21410.1 | vacuole       | 0.72       |
| AT2G21410.3 | Mitochondrion | 0.93       |

Table 2: Classification details of the 7 in silico trans-localised proteins. The rows ending with .1 show results for the first replicate and the second replicate, corresponding to the changes in localisation, are suffixed by a .3. The `svm` column defines the classification result and the `svm.scores` gives the classification posterior probability.

|             | svm           | svm.scores |
|-------------|---------------|------------|
| AT4G11010.1 | Plastid       | 1.00       |
| AT4G11010.3 | Plastid       | 1.00       |
| AT5G22640.1 | Plastid       | 0.60       |
| AT5G22640.3 | Plastid       | 0.89       |
| AT5G27850.1 | Ribosome      | 0.58       |
| AT5G27850.3 | Ribosome      | 0.76       |
| AT1G76270.1 | Golgi         | 0.35       |
| AT1G76270.3 | Golgi         | 0.94       |
| AT2G18690.1 | vacuole       | 0.39       |
| AT2G18690.3 | ER lumen      | 0.43       |
| AT2G30930.1 | PM            | 0.37       |
| AT2G30930.3 | vacuole       | 0.89       |
| AT3G62700.1 | ER lumen      | 0.27       |
| AT3G62700.3 | vacuole       | 0.85       |
| AT4G31430.1 | PM            | 0.53       |
| AT4G31430.3 | Golgi         | 0.92       |
| AT5G50370.1 | Plastid       | 0.87       |
| AT5G50370.3 | Mitochondrion | 0.86       |

Table 3: Details of the non-trans-localised proteins that had greater distance score than the smallest trans-localised protein. The `svm` column defines the classification result and the `svm.scores` gives the classification posterior probability. The protein identifiers ending with .1 are those of the first replicate and the .3 correspond to the second replicate after in silico trans-localisation.

## Concerted trans-localisations

|             | svm           | svm.scores |
|-------------|---------------|------------|
| AT2G45060.1 | Mitochondrion | 0.95       |
| AT2G45060.3 | Plastid       | 0.91       |
| AT3G02090.1 | Mitochondrion | 0.86       |
| AT3G02090.3 | Plastid       | 0.87       |
| AT3G16480.1 | Mitochondrion | 0.63       |
| AT3G16480.3 | Plastid       | 0.91       |
| AT3G51010.1 | Mitochondrion | 0.93       |
| AT3G51010.3 | Plastid       | 0.89       |
| AT3G58840.1 | Mitochondrion | 0.93       |
| AT3G58840.3 | Plastid       | 0.80       |
| AT3G59280.1 | Mitochondrion | 0.91       |
| AT3G59280.3 | Plastid       | 0.89       |
| AT3G59820.1 | Mitochondrion | 0.93       |
| AT3G59820.3 | Plastid       | 0.91       |
| AT4G05020.1 | Mitochondrion | 0.93       |
| AT4G05020.3 | Plastid       | 0.92       |
| AT4G26410.1 | Mitochondrion | 0.93       |
| AT4G26410.3 | Plastid       | 0.79       |
| AT4G27585.1 | Mitochondrion | 0.94       |
| AT4G27585.3 | Plastid       | 0.89       |
| AT4G28220.1 | Mitochondrion | 0.91       |
| AT4G28220.3 | Plastid       | 0.90       |
| AT4G28390.1 | Mitochondrion | 0.79       |
| AT4G28390.3 | Plastid       | 0.93       |
| AT4G29130.1 | Mitochondrion | 0.89       |
| AT4G29130.3 | Plastid       | 0.94       |
| AT4G29480.1 | Mitochondrion | 0.85       |
| AT4G29480.3 | Plastid       | 0.83       |
| AT4G30010.1 | Mitochondrion | 0.93       |
| AT4G30010.3 | Plastid       | 0.90       |

Table 4: Classification results for the concerted trans-localisations from the mitochondrion (first replicate ending with .1) and second, in silico perturbed replicate (.3 suffix), showing the expected plastid localisation.
